# Supplementary material for: Analytical Quality by Design (AQbD) as a multiaddressable platform for co-encapsulating drug assays
Source: Royal Society of Chemistry journal article supplement (doi:10.1039/c8ay01695j), 2018-01-01
Supplement: c8ay01695j1.pdf [file c8ay01695j1.pdf]

**Table S1.** Polynomial equations of DoE.

| <b>Curcumin</b>                                                                                                                                                                           |  |
|-------------------------------------------------------------------------------------------------------------------------------------------------------------------------------------------|--|
| T. Plate = 7997.63 – 900.09 x (Flow) + 2230.77 x (MP Composition) – 216.27 x (Flow) x (MP Composition) – 27.11 x (Flow) <sup>2</sup> + 332.44 x (MP Composition) <sup>2</sup>             |  |
| Retention Time = 5.92284 – 2.47917 x (Flow) + 2.50043 x (MP Composition) – 0.92945 x (Flow) x (MP Composition) + 0.83732 x (Flow) <sup>2</sup> + 0.85824 x (MP Composition) <sup>2</sup>  |  |
| <b>Atorvastatin calcium</b>                                                                                                                                                               |  |
| T. Plate = 10122.34 – 789.65 x (Flow) + 2579.54 x (MP Composition) + 200.40 x (Flow) x (MP Composition) - 833.98 x (Flow) <sup>2</sup> – 190.50 x (MP Composition) <sup>2</sup>           |  |
| Retention Time = 6.87806 - 2.33727 x (Flow) + 2.91718 x (MP Composition) – 0.54295 x (Flow) x (MP Composition) + 0.50954 x (Flow) <sup>2</sup> + 0.78381 x (MP Composition) <sup>2</sup>  |  |
| Resolution = 2.56646 + 0.03749 x (Flow) + 1.83279 x (MP Composition) – 0.06094 x (Flow) x (MP Composition) + 0.09613 x (Flow) <sup>2</sup> + 0.26467 x (MP Composition) <sup>2</sup>      |  |
| <b>Celecoxib</b>                                                                                                                                                                          |  |
| T. Plate = 13802.36 – 716.66 x (Flow) + 2083.86 x (MP Composition) + 530.05 x (Flow) x (MP Composition) – 400.60 x (Flow) <sup>2</sup> – 750.78 x (MP Composition) <sup>2</sup>           |  |
| Retention Time = 10.90207 – 2.80362 x (Flow) + 3.79246 x (MP Composition) + 0.23224 x (Flow) x (MP Composition) - 0.03713 x (Flow) <sup>2</sup> + 0.33921 x (MP Composition) <sup>2</sup> |  |

**Table S2.** ANOVA and t-test parameters for the characterization of the DoE responses.

| <b>Curcumin</b>                                                                  |                       |                                                          |                                                           |                                                  |                                           |                                                  |
|----------------------------------------------------------------------------------|-----------------------|----------------------------------------------------------|-----------------------------------------------------------|--------------------------------------------------|-------------------------------------------|--------------------------------------------------|
| <b>T.plate</b>                                                                   | <b>β<sub>0</sub></b>  | <b>β<sub>1</sub></b>                                     | <b>β<sub>2</sub></b>                                      | <b>β<sub>12</sub></b>                            | <b>β<sub>11</sub></b>                     | <b>β<sub>22</sub></b>                            |
| t value<br>p value                                                               | 71.252<br>< 2e-16 *** | -14.641<br>< 2e-16 ***                                   | 36.285<br>< 2e-16 ***                                     | -2.872<br>0.00449 **                             | -0.255<br>0.79927                         | 3.122<br>0.00205 **                              |
| Degrees of freedom<br>Sum of squares<br>Mean square<br>F<br>significance p value |                       | 1<br>116663768<br>116663768<br>212.0145<br>< 2.2e-16 *** | 1<br>716595369<br>716595369<br>1302.2777<br>< 2.2e-16 *** | 1<br>4490116<br>4490116<br>8.1599<br>0.004719 ** | 1<br>35283<br>35283<br>0.0641<br>0.800348 | 1<br>5304795<br>5304795<br>9.6405<br>0.002170 ** |
| <b>Retention Time</b>                                                            | <b>β<sub>0</sub></b>  | <b>β<sub>1</sub></b>                                     | <b>β<sub>2</sub></b>                                      | <b>β<sub>12</sub></b>                            | <b>β<sub>11</sub></b>                     | <b>β<sub>22</sub></b>                            |
| t value<br>p value                                                               | 220.43<br>< 2e-16 *** | -168.45<br>< 2e-16 ***                                   | 169.90<br>< 2e-16 ***                                     | -51.56<br>< 2e-16 ***                            | 32.85<br>< 2e-16 ***                      | 33.67<br>< 2e-16 ***                             |
| Degrees of freedom<br>Sum of squares<br>Mean square                              |                       | 1<br>885.06<br>885.06                                    | 1<br>900.31<br>900.31                                     | 1<br>82.93<br>82.93                              | 1<br>33.65<br>33.65                       | 1<br>35.36<br>35.36                              |

|                                                                                  |                             |                                                            |                                                           |                                                         |                                                        |                                                    |
|----------------------------------------------------------------------------------|-----------------------------|------------------------------------------------------------|-----------------------------------------------------------|---------------------------------------------------------|--------------------------------------------------------|----------------------------------------------------|
| F<br>significance p value                                                        |                             | 813593<br>< 2.2e-16 ***                                    | 827610<br>< 2.2e-16 ***                                   | 76235<br>< 2.2e-16 ***                                  | 30935<br>< 2.2e-16 ***                                 | 32500<br>< 2.2e-16 ***                             |
| <b>Tailing Factor</b>                                                            | <b><math>\beta_0</math></b> | <b><math>\beta_1</math></b>                                | <b><math>\beta_2</math></b>                               | <b><math>\beta_{12}</math></b>                          | <b><math>\beta_{11}</math></b>                         | <b><math>\beta_{22}</math></b>                     |
| t value<br>p value                                                               | 138.523<br><2e-16 ***       | 0.180<br>0.857                                             | -9.614<br><2e-16 ***                                      | -0.579<br>0.563                                         | 0.225<br>0.822                                         | -0.269<br>0.788                                    |
| Degrees of freedom<br>Sum of squares<br>Mean square<br>F<br>significance p value |                             | 1<br>0.00014<br>0.00014<br>0.0321<br>0.8580                | 1<br>0.39250<br>0.39250<br>91.2871<br><2e-16 ***          | 1<br>0.00143<br>0.00143<br>0.3317<br>0.5653             | 1<br>0.00022<br>0.00022<br>0.0501<br>0.8231            | 1<br>0.00031<br>0.00031<br>0.0713<br>0.7897        |
| <b>Sensitivity</b>                                                               | <b><math>\beta_0</math></b> | <b><math>\beta_1</math></b>                                | <b><math>\beta_2</math></b>                               | <b><math>\beta_{12}</math></b>                          | <b><math>\beta_{11}</math></b>                         | <b><math>\beta_{22}</math></b>                     |
| t value<br>p value                                                               | 31.268<br>< 2e-16 ***       | -15.706<br>4.42e-13 ***                                    | -4.307<br>0.000312 ***                                    | 5.024<br>5.67e-05 ***                                   | 1.196<br>0.245161                                      | -2.638<br>0.015372 *                               |
| Degrees of freedom<br>Sum of squares<br>Mean square<br>F<br>significance p value |                             | 1<br>2812600001<br>2812600001<br>246.6786<br>4.417e-13 *** | 1<br>211548737<br>211548737<br>18.5538<br>0.0003115 ***   | 1<br>287747720<br>287747720<br>25.2369<br>5.669e-05 *** | 1<br>16299819<br>16299819<br>1.4296<br>0.2451615       | 1<br>79356916<br>79356916<br>6.9600<br>0.0153721 * |
| <b>Atorvastatin calcium</b>                                                      |                             |                                                            |                                                           |                                                         |                                                        |                                                    |
| <b>T.plate</b>                                                                   | <b><math>\beta_0</math></b> | <b><math>\beta_1</math></b>                                | <b><math>\beta_2</math></b>                               | <b><math>\beta_{12}</math></b>                          | <b><math>\beta_{11}</math></b>                         | <b><math>\beta_{22}</math></b>                     |
| t value<br>p value                                                               | 104.034<br>< 2e-16 ***      | -14.773<br>< 2e-16 ***                                     | 48.259<br>< 2e-16 ***                                     | 3.056<br>0.00254 **                                     | -9.030<br>< 2e-16 ***                                  | -2.063<br>0.04039 *                                |
| Degrees of freedom<br>Sum of squares<br>Mean square<br>F<br>significance p value |                             | 1<br>93532936<br>93532936<br>521.0503<br>< 2.2e-16 ***     | 1<br>950709285<br>950709285<br>5296.1809<br>< 2.2e-16 *** | 1<br>3955048<br>3955048<br>22.0327<br>4.885e-06 ***     | 1<br>33269404<br>33269404<br>185.3361<br>< 2.2e-16 *** | 1<br>1737757<br>1737757<br>9.6806<br>0.002126 **   |
| <b>Retention Time</b>                                                            | <b><math>\beta_0</math></b> | <b><math>\beta_1</math></b>                                | <b><math>\beta_2</math></b>                               | <b><math>\beta_{12}</math></b>                          | <b><math>\beta_{11}</math></b>                         | <b><math>\beta_{22}</math></b>                     |
| t value<br>p value                                                               | 241.76<br><2e-16 ***        | -149.53<br><2e-16 ***                                      | 186.62<br><2e-16 ***                                      | -28.31<br><2e-16 ***                                    | 18.86<br><2e-16 ***                                    | 29.02<br><2e-16 ***                                |
| Degrees of freedom<br>Sum of squares<br>Mean square<br>F<br>significance p value |                             | 1<br>795.45<br>795.45<br>600910.0<br>< 2.2e-16 ***         | 1<br>1216.16<br>1216.16<br>918725.1<br>< 2.2e-16 ***      | 1<br>28.48<br>28.48<br>21514.1<br>< 2.2e-16 ***         | 1<br>12.34<br>12.34<br>9323.0<br>< 2.2e-16 ***         | 1<br>29.42<br>29.42<br>22223.8<br>< 2.2e-16 ***    |
| <b>Tailing Factor</b>                                                            | <b><math>\beta_0</math></b> | <b><math>\beta_1</math></b>                                | <b><math>\beta_2</math></b>                               | <b><math>\beta_{12}</math></b>                          | <b><math>\beta_{11}</math></b>                         | <b><math>\beta_{22}</math></b>                     |
| t value<br>p value                                                               | 30.600<br>< 2e-16 ***       | -1.239<br>0.217                                            | 13.865<br>< 2e-16 ***                                     | -1.549<br>0.123                                         | -8.779<br>5.94e-16 ***                                 | -8.588<br>2.05e-15 ***                             |
| Degrees of freedom<br>Sum of squares<br>Mean square<br>F<br>significance p value |                             | 1<br>0.2069<br>0.2069<br>163.48<br>< 2.2e-16 ***           | 1<br>19.4697<br>19.4697<br>15387.25<br>< 2.2e-16 ***      | 1<br>0.2191<br>0.219<br>173.12<br>< 2.2e-16 ***         | 1<br>7.8648<br>7.8648<br>6215.68<br>< 2.2e-16 ***      | 1<br>7.5601<br>7.5601<br>5974.91<br>< 2.2e-16 ***  |
| <b>Resolution</b>                                                                | <b><math>\beta_0</math></b> | <b><math>\beta_1</math></b>                                | <b><math>\beta_2</math></b>                               | <b><math>\beta_{12}</math></b>                          | <b><math>\beta_{11}</math></b>                         | <b><math>\beta_{22}</math></b>                     |

|                                                                                  |                             |                                                            |                                                          |                                                         |                                                         |                                                       |
|----------------------------------------------------------------------------------|-----------------------------|------------------------------------------------------------|----------------------------------------------------------|---------------------------------------------------------|---------------------------------------------------------|-------------------------------------------------------|
| t value<br>p value                                                               | 29.775<br>< 2e-16 ***       | 0.792<br>0.42953                                           | 38.701<br>< 2e-16 ***                                    | -1.049<br>0.29551                                       | 1.175<br>0.24146                                        | 3.234<br>0.00142**                                    |
| Degrees of freedom<br>Sum of squares<br>Mean square<br>F<br>significance p value |                             | 1<br>0.09<br>0.09<br>0.2984<br>0.5854704                   | 1<br>480.54<br>480.54<br>1601.1811<br>< 2.2e-16 ***      | 1<br>0.37<br>0.37<br>1.2255<br>0.2695752                | 1<br>0.44<br>0.44<br>1.4550<br>0.2291118                | 1<br>3.35<br>3.35<br>11.1768<br>0.0009838 ***         |
| <b>Sensitivity</b>                                                               | <b><math>\beta_0</math></b> | <b><math>\beta_1</math></b>                                | <b><math>\beta_2</math></b>                              | <b><math>\beta_{12}</math></b>                          | <b><math>\beta_{11}</math></b>                          | <b><math>\beta_{22}</math></b>                        |
| t value<br>p value                                                               | 16.223<br>2.35e-13 ***      | -8.028<br>7.78e-08 ***                                     | -3.018<br>0.00655 **                                     | 2.528<br>0.01956 *                                      | 2.433<br>0.02398 *                                      | -1.431<br>0.16702                                     |
| Degrees of freedom<br>Sum of squares<br>Mean square<br>F<br>significance p value |                             | 1<br>1172506454<br>1172506454<br>30320.16<br>< 2.2e-16 *** | 1<br>165680672<br>165680672<br>4284.38<br>< 2.2e-16 ***  | 1<br>116264325<br>116264325<br>3006.51<br>< 2.2e-16 *** | 1<br>107718663<br>107718663<br>2785.53<br>< 2.2e-16 *** | 1<br>37276999<br>37276999<br>963.96<br>< 2.2e-16 ***  |
| <b>Celecoxib</b>                                                                 |                             |                                                            |                                                          |                                                         |                                                         |                                                       |
| <b>T.plate</b>                                                                   | <b><math>\beta_0</math></b> | <b><math>\beta_1</math></b>                                | <b><math>\beta_2</math></b>                              | <b><math>\beta_{12}</math></b>                          | <b><math>\beta_{11}</math></b>                          | <b><math>\beta_{22}</math></b>                        |
| t value<br>p value                                                               | 222.509<br>< 2e-16 ***      | -21.093<br>< 2e-16 ***                                     | 61.334<br>< 2e-16 ***                                    | 12.738<br>< 2e-16 ***                                   | -6.807<br>1.02e-10 ***                                  | -12.758<br>< 2e-16 ***                                |
| Degrees of freedom<br>Sum of squares<br>Mean square<br>F<br>significance p value |                             | 1<br>73957669<br>73957669<br>444.928<br>< 2.2e-16 ***      | 1<br>625313952<br>625313952<br>3761.875<br>< 2.2e-16 *** | 1<br>26971296<br>26971296<br>162.259<br>< 2.2e-16 ***   | 1<br>7703032<br>7703032<br>46.341<br>1.023e-10 ***      | 1<br>27056086<br>27056086<br>162.769<br>< 2.2e-16 *** |
| <b>Retention Time</b>                                                            | <b><math>\beta_0</math></b> | <b><math>\beta_1</math></b>                                | <b><math>\beta_2</math></b>                              | <b><math>\beta_{12}</math></b>                          | <b><math>\beta_{11}</math></b>                          | <b><math>\beta_{22}</math></b>                        |
| t value<br>p value                                                               | 73.084<br>< 2e-16 ***       | -34.314<br>< 2e-16 ***                                     | 46.416<br>< 2e-16 ***                                    | 2.321<br>0.0213 *                                       | -0.262<br>0.7933                                        | 2.397<br>0.0174 *                                     |
| Degrees of freedom<br>Sum of squares<br>Mean square<br>F<br>significance p value |                             | 1<br>1131.89<br>1131.89<br>357942.526<br>< 2.2e-16 ***     | 1<br>2071.11<br>2071.11<br>654960.467<br>< 2.2e-16 ***   | 1<br>5.18<br>5.18<br>1637.400<br>< 2.2e-16 ***          | 1<br>0.07<br>0.07<br>20.921<br>8.235e-06 ***            | 1<br>5.52<br>5.52<br>1746.567<br>< 2.2e-16 ***        |
| <b>Tailing Factor</b>                                                            | <b><math>\beta_0</math></b> | <b><math>\beta_1</math></b>                                | <b><math>\beta_2</math></b>                              | <b><math>\beta_{12}</math></b>                          | <b><math>\beta_{11}</math></b>                          | <b><math>\beta_{22}</math></b>                        |
| t value<br>p value                                                               | 389.916<br>< 2e-16 ***      | 1.200<br>0.2313                                            | -34.722<br>< 2e-16 ***                                   | -7.323<br>5.09e-12 ***                                  | 3.311<br>0.0011 **                                      | 7.716<br>4.78e-13 ***                                 |
| Degrees of freedom<br>Sum of squares<br>Mean square<br>F<br>significance p value |                             | 1<br>0.00050<br>0.00050<br>2.7959<br>0.09602               | 1<br>0.42044<br>0.42044<br>2339.3195<br>< 2.2e-16 ***    | 1<br>0.01870<br>0.01870<br>104.0686<br>< 2.2e-16 ***    | 1<br>0.00382<br>0.00382<br>21.2669<br>6.992e-06 ***     | 1<br>0.02076<br>0.02076<br>115.5290<br>< 2.2e-16 ***  |
| <b>Sensitivity</b>                                                               | <b><math>\beta_0</math></b> | <b><math>\beta_1</math></b>                                | <b><math>\beta_2</math></b>                              | <b><math>\beta_{12}</math></b>                          | <b><math>\beta_{11}</math></b>                          | <b><math>\beta_{22}</math></b>                        |
| t value<br>p value                                                               | 2.604<br>0.0166 *           | 0.053<br>0.9580                                            | -0.090<br>0.9289                                         | 0.027<br>0.9784                                         | 0.906<br>0.3753                                         | -1.393<br>0.1783                                      |
| Degrees of freedom<br>Sum of squares<br>Mean square<br>F<br>significance p value |                             | 1<br>6.5368e+07<br>6.5368e+07<br>0.0028<br>0.9580          | 1<br>1.8781e+08<br>1.8781e+08<br>0.0082<br>0.9289        | 1<br>1.7206e+07<br>1.7206e+07<br>0.0007<br>0.9784       | 1<br>1.8872e+10<br>1.8872e+10<br>0.8204<br>0.3753       | 1<br>4.4616e+10<br>4.4616e+10<br>1.9396<br>0.1783     |

Signif. codes: 0 '\*\*\*' 0.001 '\*\*' 0.01 '\*' 0.05

**Table S3.** Determination coefficient ( $R^2$ ) values for the responses.

| <b>R<sup>2</sup> Value</b> | <b>ATO</b> | <b>CUR</b> | <b>CXB</b> |
|----------------------------|------------|------------|------------|
| <b>T.Plate</b>             | 0.9272     | 0.8806     | 0.9561     |
| <b>Retention Time</b>      | 0.9965     | 0.9966     | 0.9409     |
| <b>Resolution</b>          | 0.9968     | -          | -          |

**Table S4.** Validation of MODR.

| <b>Predicted values</b>          |                       |                  |                       |                  |                   |                       |                  |
|----------------------------------|-----------------------|------------------|-----------------------|------------------|-------------------|-----------------------|------------------|
| <b>Level</b>                     | <b>CUR</b>            |                  | <b>ATO</b>            |                  |                   | <b>CXB</b>            |                  |
|                                  | <b>Retention time</b> | <b>T. Plates</b> | <b>Retention time</b> | <b>T. Plates</b> | <b>Resolution</b> | <b>Retention time</b> | <b>T. Plates</b> |
| <b>(-0.2, +0.4)</b>              | 4.674                 | 7218             | 5.516                 | 9133             | 2.246             | 9.011                 | 12962            |
| <b>(+0.2, +0.8)</b>              | 4.861                 | 7685             | 5.862                 | 9497             | 3.025             | 9.445                 | 13444            |
| <b>Experimental values (n=3)</b> |                       |                  |                       |                  |                   |                       |                  |
| <b>Level</b>                     | <b>CUR</b>            |                  | <b>ATO</b>            |                  |                   | <b>CXB</b>            |                  |
|                                  | <b>Retention time</b> | <b>T. Plates</b> | <b>Retention time</b> | <b>T. Plates</b> | <b>Resolution</b> | <b>Retention time</b> | <b>T. Plates</b> |
| <b>(-0.2, +0.4)</b>              | 5.026±0.007           | 7658±399         | 5.628±0.004           | 8779±228         | 2.561±0.055       | 8.390±0.008           | 12708±198        |
| <b>(+0.2, +0.8)</b>              | 5.082±0.007           | 8025±439         | 5.850±0.004           | 9231±206         | 3.267±0.037       | 8.735±0.002           | 13135±214        |
